# Supplementary material for: Climate Change Impacts on the Density Altitude of Chinese Airports in Summer
Source: Preprints.org preprint supplement (doi:10.20944/preprints202309.0144.v1), 2023-09-04
Supplement: Supplementary file 1 [file supplementary]

Table S1. Details of CMIP6 models.

| Model name    | Institution                                                                                                                                                                                         |
|---------------|-----------------------------------------------------------------------------------------------------------------------------------------------------------------------------------------------------|
| ACCESS-CM2    | CSIRO (Commonwealth Scientific and Industrial Research Organisation, Aspendale), ARCCSS (Australian Research Council Centre of Excellence for Climate System Science)                               |
| ACCESS-ESM1-5 | CSIRO                                                                                                                                                                                               |
| BCC-CSM2-MR   | Beijing Climate Center                                                                                                                                                                              |
| CanESM5-CanOE | Canadian Centre for Climate Modelling and Analysis, Environment and Climate Change Canada                                                                                                           |
| CanESM5       |                                                                                                                                                                                                     |
| CESM2         | NCAR (National Center for Atmospheric Research, Climate and Global Dynamics Laboratory)                                                                                                             |
| CESM2-WACCM   |                                                                                                                                                                                                     |
| CNRM-CM6-1    |                                                                                                                                                                                                     |
| CNRM-CM6-1-HR | CNRM (Centre National de Recherches Meteorologiques), CERFACS (Centre Europeen de Recherche et de Formation Avancee en Calcul Scientifique)                                                         |
| CNRM-ESM2-1   |                                                                                                                                                                                                     |
| EC-Earth3     |                                                                                                                                                                                                     |
| EC-Earth3-Veg | EC-Earth-Consortium, Europe-wide consortium                                                                                                                                                         |
| FGOALS-f3-L   |                                                                                                                                                                                                     |
| FGOALS-g3     | Chinese Academy of Sciences                                                                                                                                                                         |
| GFDL-CM4      |                                                                                                                                                                                                     |
| GFDL-ESM4     | National Oceanic and Atmospheric Administration, Geophysical Fluid Dynamics Laboratory                                                                                                              |
| GISS-E2-1-G   | Goddard Institute for Space Studies                                                                                                                                                                 |
| INM-CM4-8     |                                                                                                                                                                                                     |
| INM-CM5-0     | Institute for Numerical Mathematics, Russian Academy of Science                                                                                                                                     |
| IPSL-CM6A-LR  | Institut Pierre Simon Laplace                                                                                                                                                                       |
| KACE-1-0-G    | National Institute of Meteorological Sciences/Korea Meteorological Administration, Climate Research Division                                                                                        |
| MCM-UA-1-0    | Consortium for Mathematics and Its Applications                                                                                                                                                     |
| MIROC6        | JAMSTEC (Japan Agency for Marine-Earth Science and Technology), AORI (Atmosphere and Ocean Research Institute, The University of Tokyo), NIES (National Institute for Environmental Studies), and R |
| MIROC-ES2L    | CCS (RIKEN Center for Computational Science)                                                                                                                                                        |

|               |                                                                                                                                                                                                                                    |
|---------------|------------------------------------------------------------------------------------------------------------------------------------------------------------------------------------------------------------------------------------|
| MPI-ESM1-2-HR | Max Planck Institute for Meteorology, Germany                                                                                                                                                                                      |
| MPI-ESM1-2-LR | Max Planck Institute for Meteorology                                                                                                                                                                                               |
| MRI-ESM2-0    | Meteorological Research Institute, Japan                                                                                                                                                                                           |
| NESM3         | Nanjing University of Information Science and Technology                                                                                                                                                                           |
| NorESM2-LM    | NorESM Climate modeling Consortium consisting of CICERO (Center for International Climate and Environmental Research)                                                                                                              |
| NorESM2-MM    |                                                                                                                                                                                                                                    |
| UKESM1-0-LL   | Met Office Hadley Centre; Natural Environment Research Council; National Institute of Meteorological Sciences/Korea Meteorological Administration, Climate Research Division; National Institute of Water and Atmospheric Research |

---
